# Supplementary figures and images for: Cacao Polyphenol-Rich Dark Chocolate Intake Contributes to Efficient Brain Activity during Cognitive Tasks: A Randomized, Single-Blinded, Crossover, and Dose-Comparison fMRI Study
Source: MDPI journal article supplement (doi:10.3390/nu16010041), 2023-12-21

Supplementary figures

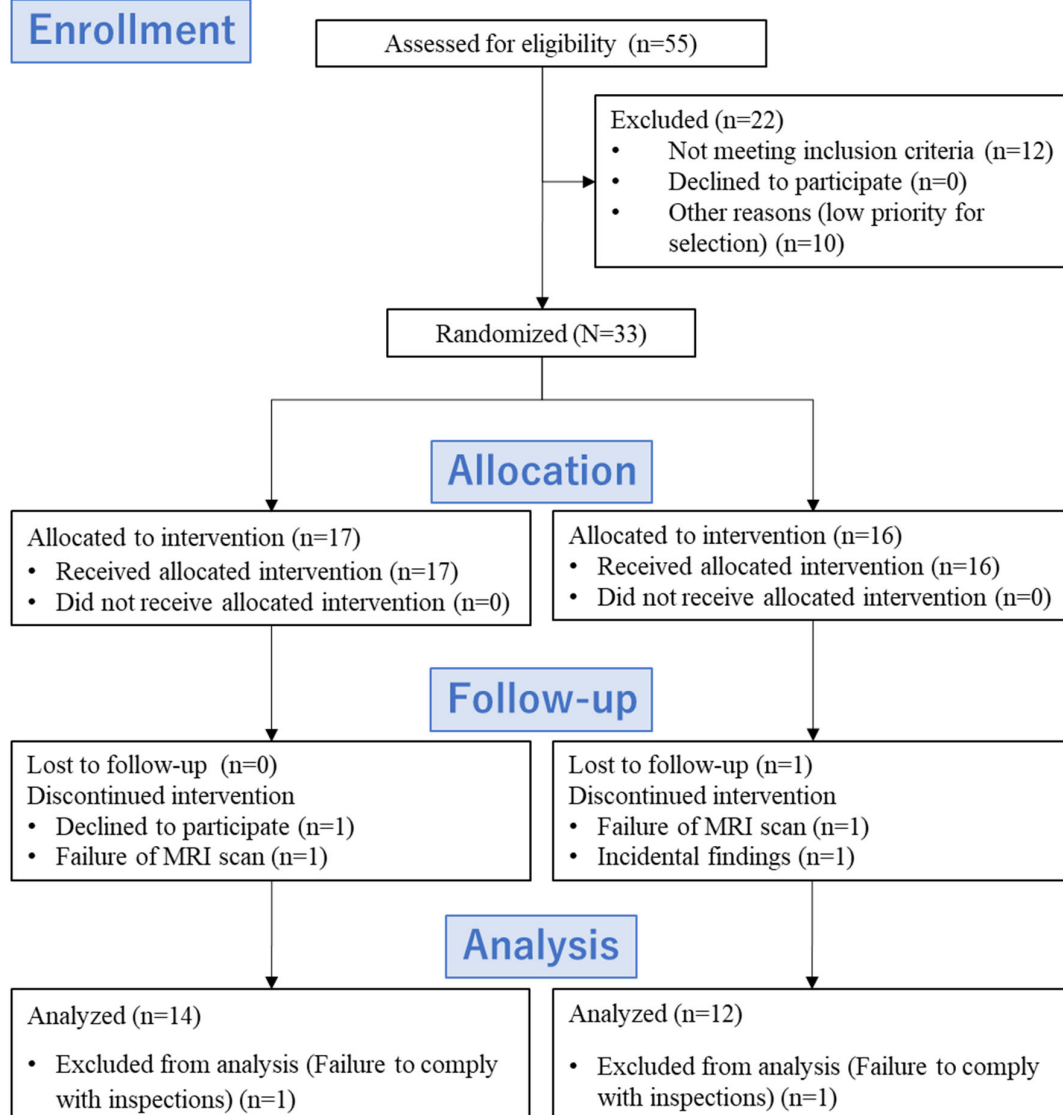

**Figure S1.** Participants' flowchart. MRI, magnetic resonance imaging.

Supplement: s1 [file s1]
